# Supplementary material
Source: Springer Nature journal article supplement (https://www.springermedizin.de/resource/supplementary/12875_2011_737_MOESM3_ESM.pdf/9435204)

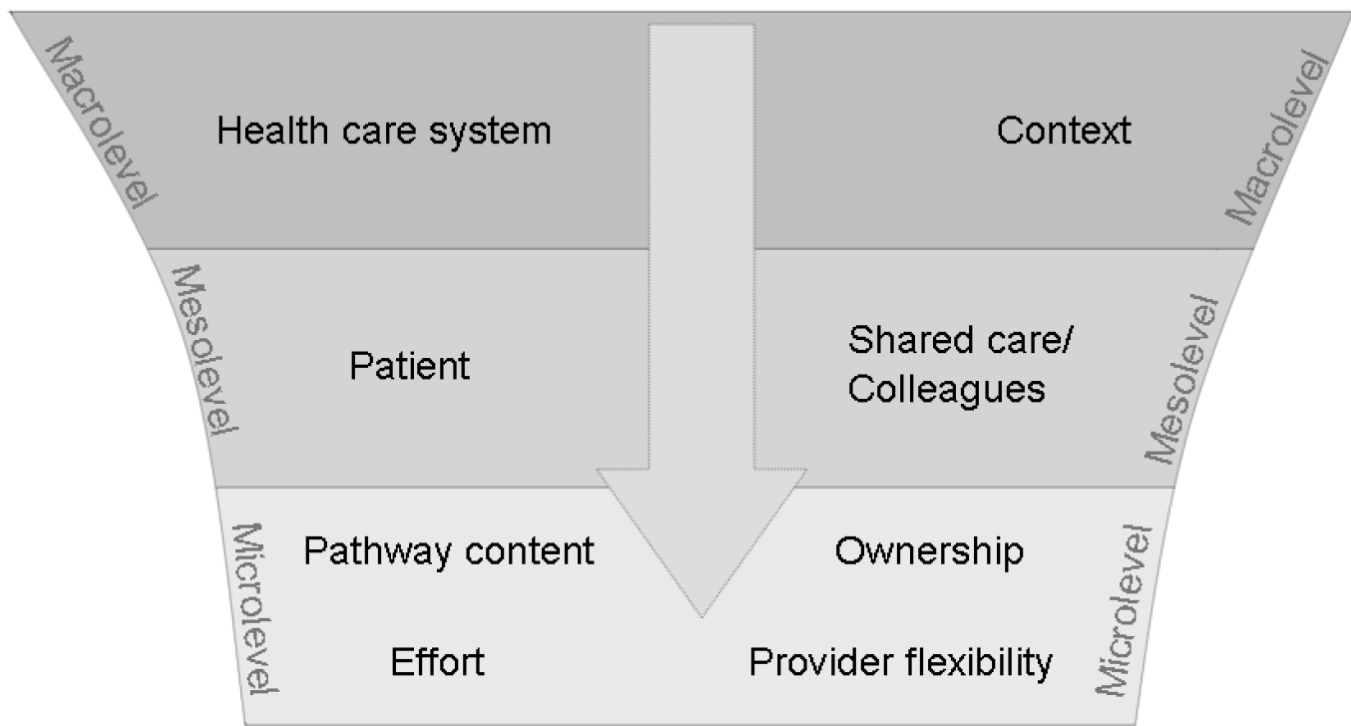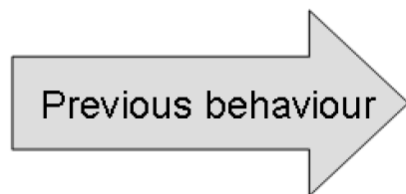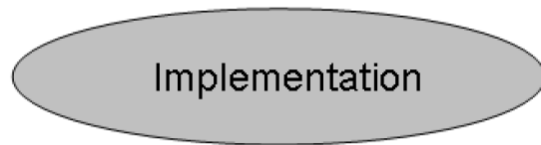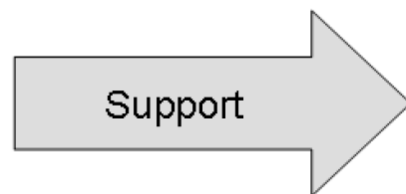

Time

Supplement: MOESM3 [file 9435204]
